# Supplementary material for: Characterization of biofilm formation by Enterococcus faecalis isolates derived from urinary tract infections in China
Source: PubMed Central journal article supplement (PMC5882073; doi:10.1099/jmm.0.000647), 2017-11-17
Supplement: jmm-67-60-s001.pdf [file jmm-67-60-s001.pdf]

**Table S1. PCR primers used for detection of *E. faecalis* virulence factors.**

| Target      | Primer         | Primer sequence (5'-3')   | Amplicon size (bp) | Ref. |
|-------------|----------------|---------------------------|--------------------|------|
| <i>esp</i>  | <i>esp</i> -F  | AATTGATTCTTTAGCATCTGG     | 510                | [20] |
|             | <i>esp</i> -R  | AGATTCATCTTTGATTCTTGG     |                    |      |
| <i>gelE</i> | <i>gelE</i> -F | TATGACAATGCTTTTTGGGAT     | 213                | [20] |
|             | <i>gelE</i> -R | AGATGCACCCGAAATAATATA     |                    |      |
| <i>asaI</i> | <i>asaI</i> -F | GCACGCTATTACGAACTATGA     | 375                | [20] |
|             | <i>asaI</i> -R | TAAGAAAGAACATCACCACGA     |                    |      |
| <i>cylA</i> | <i>cylA</i> -F | ACTCGGGGATTGATAGGC        | 688                | [20] |
|             | <i>cylA</i> -R | GCTGCTAAAGCTGCGCTT        |                    |      |
| <i>hyl</i>  | <i>hyl</i> -F  | GACTGACGTCCAAGTTTCCAA     | 276                | [20] |
|             | <i>hyl</i> -R  | ACAGAAGAGCTGCAGGAAATG     |                    |      |
| <i>agg</i>  | <i>agg</i> -F  | CCAGTAATCAGTCCAGAAACAACC  | 406                | [21] |
|             | <i>agg</i> -R  | TAGCTTTTTTCATTCTTGTGTTTGT |                    |      |

**Table S2. PCR primers used for *E. faecalis* MLST gene diversity determination.**

| Target      | Primer         | Primer sequence (5'-3')  | Amplicon size (bp) | Ref. |
|-------------|----------------|--------------------------|--------------------|------|
| <i>gdh</i>  | <i>gdh</i> -F  | GGCGCACTAAAAGATATGGT     | 530                | [22] |
|             | <i>gdh</i> -R  | CCAAGATTGGGCAACTTCGTCCCA |                    |      |
| <i>gyd</i>  | <i>gyd</i> -F  | CAAACCTGCTTAG CTCCAATGGC | 395                | [22] |
|             | <i>gyd</i> -R  | CATTTTCGTTGTCATACCAAGC   |                    |      |
| <i>pstS</i> | <i>pstS</i> -F | CGGAACAGGACTTTTCGC       | 583                | [22] |
|             | <i>pstS</i> -R | ATTTACATCACGTTCTACTTGC   |                    |      |
| <i>gki</i>  | <i>gki</i> -F  | GATTTTGTGGGAATTGGTATGG   | 438                | [22] |
|             | <i>gki</i> -R  | ACCATTAAAGCAAAATGATCGC   |                    |      |
| <i>aroE</i> | <i>aroE</i> -F | TGGAAAACCTTTACGGAGACAGC  | 459                | [22] |
|             | <i>aroE</i> -R | GTCCTG TCCATTGTTCAAAAGC  |                    |      |
| <i>xpt</i>  | <i>xpt</i> -F  | AAAATGATGGCCGTGTATTAGG,  | 456                | [22] |
|             | <i>xpt</i> -R  | AACGTCACCGTTCCTTCACTTA   |                    |      |
| <i>yqiL</i> | <i>yqiL</i> -F | CAGCTTAAGTCAAG TAAGTGCCG | 436                | [22] |
|             | <i>yqiL</i> -R | GAATATCCCTTCTGCTTGTGCT   |                    |      |

**Table S3. PCR primers used for detecting the expression levels of *esp*, *agg*, and *cylA* *E. faecalis* isolates by qRT-PCR.**

| Target      | Primer          | Primer sequence (5'-3') | Amplicon size (bp) | Source or Ref. |
|-------------|-----------------|-------------------------|--------------------|----------------|
| <i>recA</i> | <i>recA</i> -F  | CGACTAATGTCTCAAGCACTAC  | 106                | This study     |
|             | <i>recA</i> -R  | CGAACATCACGCCAACTT      |                    |                |
| <i>esp</i>  | <i>Resp</i> -F  | GCATCAGTATTAGTTGGT      | 196                | This study     |
|             | <i>Resp</i> -R  | TTCCTTGTAACACATCAC      |                    |                |
| <i>agg</i>  | <i>Ragg</i> -F  | CGTTGATAAAGCAGTTGAT     | 130                | This study     |
|             | <i>Ragg</i> -R  | TTGTAGTTGGTCTACTTCTT    |                    |                |
| <i>cylA</i> | <i>RcylA</i> -F | GGAGGATATGGTGACAAT      | 163                | This study     |
|             | <i>RcylA</i> -R | TTACTTCTGGAGTTGCTAA     |                    |                |

**Table S4. Biofilm formation according to ST of 98 *E. faecalis* isolates.**

| STs (n)           | No. (%) of isolates with biofilm phenotype |                  |                  |
|-------------------|--------------------------------------------|------------------|------------------|
|                   | Weak                                       | Strong           | All positive     |
| ST4 (3)           | 2 (66.7)                                   | 0 (0.0)          | 3 (100.0)        |
| ST6 (2)           | 1 (50.0)                                   | 0 (0.0)          | 1 (50.0)         |
| ST16 (34)         | 11 (32.4)                                  | 7 (20.6)         | 22 (64.8)        |
| ST21 (1)          | 0 (0.0)                                    | 0 (0.0)          | 0 (0.0)          |
| ST30 (3)          | 0 (0.0)                                    | 0 (0.0)          | 0 (0.0)          |
| ST34 (1)          | 0 (0.0)                                    | 0 (0.0)          | 0 (0.0)          |
| ST40 (3)          | 0 (0.0)                                    | 2 (66.7)         | 2 (66.7)         |
| ST47 (2)          | 0 (0.0)                                    | 1 (50.0)         | 2 (100.0)        |
| ST63 (1)          | 1 (100.0)                                  | 0 (0.0)          | 1 (100.0)        |
| ST69 (1)          | 0 (0.0)                                    | 1 (100.0)        | 1 (100.0)        |
| ST139 (1)         | 0 (0.0)                                    | 0 (0.0)          | 1 (100.0)        |
| ST179 (32)        | 8 (25.0)                                   | 0 (0.0)          | 10 (31.3)        |
| ST202 (1)         | 0 (0.0)                                    | 0 (0.0)          | 0 (0.0)          |
| ST207 (1)         | 1 (100.0)                                  | 0 (0.0)          | 1 (100.0)        |
| ST300 (1)         | 0 (0.0)                                    | 0 (0.0)          | 0 (0.0)          |
| ST403 (1)         | 0 (0.0)                                    | 0 (0.0)          | 0 (0.0)          |
| ST409 (2)         | 0 (0.0)                                    | 0 (0.0)          | 1 (50.0)         |
| ST414 (1)         | 0 (0.0)                                    | 0 (0.0)          | 0 (0.0)          |
| ST480 (3)         | 0 (0.0)                                    | 2 (66.7)         | 3 (100.0)        |
| ST506 (1)         | 0 (0.0)                                    | 0 (0.0)          | 0 (0.0)          |
| ST541 (1)         | 0 (0.0)                                    | 0 (0.0)          | 1 (100.0)        |
| ST585 (1)         | 0 (0.0)                                    | 1 (100.0)        | 1 (100.0)        |
| ST7480 (1)        | 0 (0.0)                                    | 1 (100.0)        | 1 (100.0)        |
| <b>Total (98)</b> | <b>24(24.5)</b>                            | <b>15 (15.3)</b> | <b>51 (52.0)</b> |

STs: sequence type;

**Table S5. Correlation between biofilm-forming capacity and antimicrobial sensitivity.**

| Antimicrobials               | Sensitive or MIC (mg/L) | No. (%) of isolates with biofilm phenotype |          |              | <i>P</i> <sup>a</sup> |
|------------------------------|-------------------------|--------------------------------------------|----------|--------------|-----------------------|
|                              |                         | Weak                                       | Strong   | All positive |                       |
| <b>erythromycin</b>          | Non-Sensitive (n=96)    | 26(27.1)                                   | 24(25.0) | 50(52.1)     | <i>0.407</i>          |
|                              | Sensitive (n=17)        | 1(5.9)                                     | 6(35.3)  | 7(41.2)      |                       |
| <b>ciprofloxacin</b>         | Non-Sensitive (n=40)    | 10(25.0)                                   | 14(35.0) | 24(60.0)     | <i>0.133</i>          |
|                              | Sensitive (n=73)        | 16(21.9)                                   | 17(23.3) | 33(45.2)     |                       |
| <b>tetracycline</b>          | Non-Sensitive (n=102)   | 25(24.5)                                   | 29(28.4) | 54(52.9)     | <i>0.106</i>          |
|                              | Sensitive (n=11)        | 2(18.2)                                    | 1(9.1)   | 3(27.3)      |                       |
| <b>High-level gentamicin</b> | Non-Sensitive (n=63)    | 13(20.6)                                   | 19(30.2) | 32(50.8)     | <i>0.933</i>          |
|                              | Sensitive (n=50)        | 14(28.0)                                   | 11(22.0) | 25(50.0)     |                       |
| <b>linezolid</b>             | MIC >2 ( n = 18)        | 5(27.8)                                    | 6(33.3)  | 11(61.1)     | <i>0.323</i>          |
|                              | MIC ≤ 2 (n= 95)         | 22(23.2)                                   | 24(25.4) | 46(48.4)     |                       |

**MIC:** minimum inhibitory concentration; **High-level gentamicin:** >500mg/L; **Non-Sensitive:** including the resistant and medium isolates; <sup>a</sup>: biofilm phenotype-All positive: Non-Sensitive group vs Sensitive group;
